PLOS One


Skip to main content

Advertisement

- plos.org
- Create account
- Sign in

- - Publish
  - About
  - Browse
- Searchadvanced search
- Browse Topics

Browse Subject Areas

?

Click through the PLOS taxonomy to find articles in your field.

For more information about PLOS Subject Areas, click
here.

February 11, 2025

# We believe in a better future where science is open to all, for all.

Image credit: PLOS One

### Calling all experts!

#### PLOS One is seeking talented individuals to join our editorial board.

APPLY NOW

03/19/2025

Neurodevelopmental conditions

## A randomized controlled trial of the effects of dog-assisted versus robot dog-assisted therapy for children with autism or Down syndrome

Van Der Steel and colleagues observed improvements in emotional regulation and attunement in children with autism or Down's syndrome who received dog assisted therapy compared to control groups receiving robot dog-assisted therapy or no treatment.

Image credit: Child and Dog by Pexels, Pixabay

03/18/2025

Oral Health

## The association between oral health and risk behaviours of university students

Azam and colleagues examined changes in first-year university students’ self-reported oral health and health-risk behaviors.

Image credit: Toothbrush by Engin Akyurt, Pixabay

03/31/2025

Cell Biology

## Development of label-free cell tracking for discrimination of the heterogeneous mesenchymal migration

Endo and colleagues develop a label-free method for tracking cell migration to distinguish between cancerous and non-cancerous cells. The method is simple to use and does not require large training datasets, with a broad range of potential applications.

Image credit: Fig 3 by Endo et al., CC BY 4.0

03/26/2025

Archaeology

## The 12th century bronze doors of Barisanus of Trani in Trani, Ravello and Monreale

Mödlinger and colleagues use chemical and digital-twin analysis to age Middle Age bronze and brass doors.

Image credit: Fig 10 by Mödlinger et al., CC BY 4.0

03/17/2025

EveryOne

## Editor Spotlight: Adrián Diaz-Faes

In this interview, PLOS One Academic Editor Adrián Diaz-Faes shares his experience with PLOS, as an author, reviewer and editor, his research interests, and advice to researchers about building their networks.

Image credit: Dr. Adrián A. Díaz-Faes by Dr. Adrián A. Díaz-Faes, CC BY 4.0

02/17/2025

EveryOne

## Editor Spotlight: Claudia Trindade Mattos

In this interview, PLOS One Academic Editor Claudia Trindade Mattos shares with us how to select reviewers, her career in dental research and clinical practice, and her role as a mentor to students and early-career researchers.

Image credit: Dr. Claudia Trindade Mattos by Dr. Claudia Trindade Mattos, CC BY 4.0

02/11/2025

EveryOne

## Ten Years of International Women and Girls in Science Day: Progress and barriers to equal representation

PLOS One Associate Editor Jenny Tucker discusses increasing representation of female STEM graduates and researchers over the last decade, and examines challenges leading to persisting under-representation of women in some areas of science.

Image credit: Image by Freepik by Freepik, Freepik

03/19/2025

Conservation Biology

## Outcomes of orangutan wild-to-wild translocations reveal conservation and welfare risks

Sherman and colleagues analyze wild-to-wild orangutan translocations during 2005-2022, and argue that forest should be conserved to avoid the need for translocations.

Image credit: Orangutan by Andrea Bohl, Pixabay

03/26/2025

Open Science

## Reproducibility and replicability in research: What 452 professors think in Universities across the USA and India

Chakravorti and colleagues find both national and disciplinary gaps in attention to reproducibility and transparency in science.

Image credit: Artificial Intelligence by Markus Winkler, Pixabay

03/31/2025

Economics

## A political economy of the tobacco supply chain in an Eastern Mediterranean country: The case of Lebanon

Abboud and colleagues qualitatively explore the dynamics of supply chains and practices within the tobacco industry using Lebanon as a case study.

Image credit: Tobacco by PublicDomainPictures, Pixabay

04/01/2025

Exercise

## Does physical activity-based intervention decrease repetitive negative thinking? A systematic review

Wang and colleagues conclude in this systematic review that physical activity-based interventions have the potential to reduce repetitive negative thinking.

Image credit: Girl running by MabelAmber, Pixabay

Collections

- ### Aging in Human Health and Disease

  In this collection, PLOS One highlights multidisciplinary research in the area of aging.
- ### Complex Systems in Healthcare

  This joint collection of PLOS One and PLOS Complex Systems articles focuses on the use of complex systems research in the healthcare context.
- ### Collections

  Browse the lastest collections of papers from across PLOS.

1   of   3

Meet our staff at conferences

- ### Conferences 2025

  New opportunities to meet our editorial staff in 2025 will be announced soon.
- ### Conferences 2025

  New opportunities to meet our editorial staff in 2025 will be announced soon.

1   of   2

### Publish with PLOS

- Submission Instructions
- Submit Your Manuscript

EveryONE

See All Blogs

### Connect with Us

- Contact Us
- RSS
- PLOS One on Bluesky
- PLOS on Facebook
- PLOS Blogs

## Get new content from PLOS One in your inbox

PLOS will use your email address to provide content from PLOS One.
You can find out more about how PLOS processes your data by reading our
Privacy Policy.
You can unsubscribe at any time by clicking the unsubscribe link in our emails or by contacting us at privacy@plos.org.

PLOS One | ISSN: 1932-6203 (online)


- Publications
- PLOS Biology
- PLOS Climate
- PLOS Complex Systems
- PLOS Computational Biology
- PLOS Digital Health
- PLOS Genetics
- PLOS Global Public Health

- PLOS Medicine
- PLOS Mental Health
- PLOS Neglected Tropical Diseases
- PLOS One
- PLOS Pathogens
- PLOS Sustainability and Transformation
- PLOS Water

- Home
- Blogs
- Collections
- Give feedback
- LOCKSS

- Privacy Policy
- Terms of Use
- Advertise
- Media Inquiries
- Contact

PLOS is a nonprofit 501(c)(3) corporation, #C2354500, based in California, US

### Cookie Preference Center

Our website uses different types of cookies. Optional cookies will only be set with your consent and you may withdraw this consent at any time. Below you can learn more about the types of cookies PLOS uses and register your cookie preferences.

Accept All Cookies

### Customize Your Cookie Preference

+**Strictly Necessary**

Always On

+**Functional**

OnOff

+**Performance and Analytics**

OnOff

+**Marketing**

OnOff

Save Selected Preferences and Close

For more information about the cookies and other technologies used by us, please read our Cookie Policy.
