# Supplementary material for: An Integrated Pipeline for de Novo Assembly of Microbial Genomes
Source: PubMed Central journal article supplement (PMC3441570; doi:10.1371/journal.pone.0042304), 2012-09-13
Supplement: pone.0042304.s003.pdf [file pone.0042304.s003.pdf]

**Table S2. Assembly metrics for SOAPdenovo running on error corrected reads from *H. volcanii* DS2**

| Assembly          | SOAPdenovo on clean reads |          |         |          |         |          |
|-------------------|---------------------------|----------|---------|----------|---------|----------|
|                   | ctg-CDS                   | scaf-CDS | ctg-N50 | scaf-N50 | ctg-LCB | scaf-LCB |
| Sequence count    | 6965                      | 237      | 6965    | 237      | 4101    | 227      |
| N50               | 3781                      | 125630   | 3781    | 125630   | 2457    | 85544    |
| Miscalled bases   | 187                       | 385      | 187     | 385      | 249     | 417      |
| Uncalled bases    | 0                         | 11567    | 0       | 11567    | 0       | 22162    |
| Extra bases       | 31091                     | 14830    | 31091   | 14830    | 65895   | 23369    |
| Missing bases     | 154938                    | 150235   | 154938  | 150235   | 160316  | 176787   |
| Extra sequences   | 4964                      | 92       | 4964    | 92       | 1206    | 81       |
| Missing replicons | 0                         | 0        | 0       | 0        | 0       | 0        |
| DCJ Distance      | 2005                      | 150      | 2005    | 150      | 2897    | 148      |
| LCB Count         | 9                         | 13       | 9       | 13       | 10      | 10       |
| Broken CDS        | 524                       | 539      | 524     | 539      | 760     | 769      |
