# Supplementary material for: An Integrated Pipeline for de Novo Assembly of Microbial Genomes
Source: PLoS One. 2012 Sep 13;7(9):e42304. doi: 10.1371/journal.pone.0042304 (PMC3441570; doi:10.1371/journal.pone.0042304)
Supplement: Table S1 — Automatically set parameters. Assembly parameters within the a5 pipeline and how their values are chosen. is the maximum inter-point distance used for spatial clustering and is the minimum number of points in a cluster. (PDF) [file pone.0042304.s002.pdf]

**Table S1. Automatically set parameters**

| Parameter                       | Stage | Default setting                                                                                         |
|---------------------------------|-------|---------------------------------------------------------------------------------------------------------|
| SGA Quality Trim (-q)           | 1     | fixed to 10, not optimized                                                                              |
| SGA Quality Filter (-f)         | 1     | fixed to 20, not optimized                                                                              |
| SGA Min Read Length (-m)        | 1     | fixed to 30, this should be larger than IDBA's min $k$ -mer                                             |
| IDBA min $k$ -mer               | 2     | 29, most $k$ -mers of this size are unique in a microbial genome but larger values may be better        |
| IDBA max $k$ -mer               | 2     | maximum read length of trimmed reads                                                                    |
| SSPACE Overhang MinOverlap (-m) | 3,5   | Max of 15 and floor of binary logarithm of genome size, plus 3.99                                       |
| SSPACE ExtendCall MinBases (-o) | 3,5   | fixed to 1                                                                                              |
| SSPACE Minimum Links (-k)       | 3,5   | base 1.4 logarithm of $E\_links$ , minus 11.5, where $E\_links = \frac{2c\mu}{l_r}$ and $c$ is coverage |
| SSPACE Min Link Ratio (-a)      | 3,5   | fixed to 0.6,0.3. These values give higher accuracy than SSPACE defaults                                |
| SSPACE Merge MinOverlap (-n)    | 3,5   | floor of (binary logarithm of mean insert size, scaled by 1.24, plus 0.99)                              |
| SSPACE Insert Mean              | 3,5   | Calculated using EM-clustering                                                                          |
| SSPACE Insert StDev             | 3,5   | Calculated using EM-clustering                                                                          |
| DBSCAN $\epsilon$               | 4     | Derived from coverage as described in main text                                                         |
| DBSCAN $MinPts$                 | 4     | Derived from coverage as described in main text                                                         |
